# Supplementary material
Source: Elsevier journal article supplement (https://www.sciencedirect.com/science/article/pii/S1888429618300980)
Supplement: mmc1 [file S1888429618300980:mmc1.docx]

**Supplementary Materials:**

The mean absolute refraction and spherical aberration profiles of the three visual field meridians were combined as 2-D colour-coded maps. Each map shows the two relevant visual field quadrants measured per selected eye. Comparison of the colour-coded refraction maps for the test lens were made with the maps obtained from the same eyes wearing the single vision control lens.

**S1:** Refraction maps (M in D) for the following test lenses: a) Biofinity, b) Focus Night & Day, c) MiSight, d) Proclear Multifocal Distance High Add and e) Proclear Multifocal Near High Add (Right Maps) have been made with data obtained from the same eyes wearing a control single vision lens (Left Maps: AIR OPTIX AQUA).

|  |  |
| --- | --- |
|  |  |
|  |  |

**S2:** Refraction maps (J0 in D). Comparison of the data for two test lenses (Right Maps: a) Proclear Multifocal Distance High Add, and b) Proclear Multifocal Near High Add has been made with data obtained from the same eyes wearing a control single vision lens (Left Maps: AIR OPTIX AQUA).

|  |
| --- |
|  |

**S3:** Refraction maps (J45 in D). Comparison of the data for two test lenses (Right Maps: a) Proclear Multifocal Distance High Add, and b) Proclear Multifocal Near High Add has been made with data obtained from the same eyes wearing a control single vision lens (Left Maps: AIR OPTIX AQUA).

|  |
| --- |
|  |

**S4:** Spherical aberration maps (SA in microns). Comparison of the data for two test lenses (Right Maps: a) Proclear Multifocal Distance High Add, and b) Proclear Multifocal Near High Add has been made with data obtained from the same eyes wearing a control single vision lens (Left Maps: AIR OPTIX AQUA).

|  |
| --- |
|  |
